# Supplementary material
Source: PubMed Central journal article supplement (PMC6060760)
Supplement: 424_2018_2133_MOESM1_ESM.pdf [file 424_2018_2133_MOESM1_ESM.pdf]

# Intracellular Ca<sup>2+</sup> release decelerates mitochondrial cristae dynamics within the junctions to the endoplasmic reticulum

**Short title:** *Quantification of sub-mitochondrial membrane dynamics using SIM*

Benjamin Gottschalk<sup>1</sup>, Christinae Klec<sup>1</sup>, Markus Waldeck-Weiermair<sup>1</sup>, Roland Malli<sup>1,2</sup> and Wolfgang F. Graier<sup>1,2,\*</sup>

<sup>1</sup>Molecular Biology and Biochemistry, Gottfried Schatz Research Center, Medical University of Graz, Neue Stiftingtalstraße 6/6, 8010 Graz, Austria

<sup>2</sup>BioTechMed, Graz, Austria

*\*Correspondence and requests for material should be addressed to:*

Wolfgang F. Graier, Ph.D.

Tel: +43 316 385 71963

eMail: [wolfgang.graier@medunigraz.at](mailto:wolfgang.graier@medunigraz.at)

## Supplemental Video

**Suppl. Video:** HeLa cells were stained with MTG for 40 min, washed 1x with Loading Buffer and imaged directly at a frequency of 1Hz with live N-SIM.

## Supplementary Figures

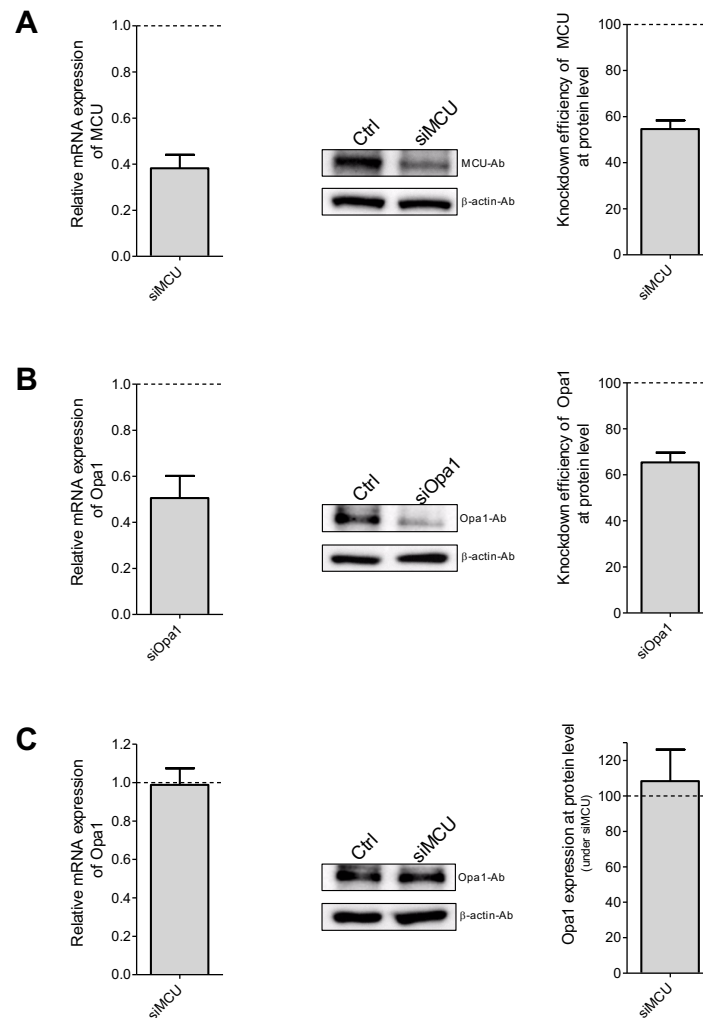

**Supplementary Figure 1.** Quantification of knockdown efficiency and examination of the influence of MCU knockdown on Opa1 expression level. **(A,B)** Verification of knockdown efficiency of **(A)** MCU and **(B)** Opa1 after treatment with scrambled control siRNA or siRNAs against the specific genes. **(C)** Opa1 expression level analysis under conditions where MCU was knocked out by specific siRNAs. (*Left panels*) quantification of mRNA expression levels by using qRT-PCR, (*middle panels*) representative Western blots, (*right panels*) corresponding statistical analysis of Western blots. For qRT-PCR and Western blot the housekeeping genes GAPDH or  $\beta$ -actin were used, respectively. Bars represent mean  $\pm$  SEM, n=3.

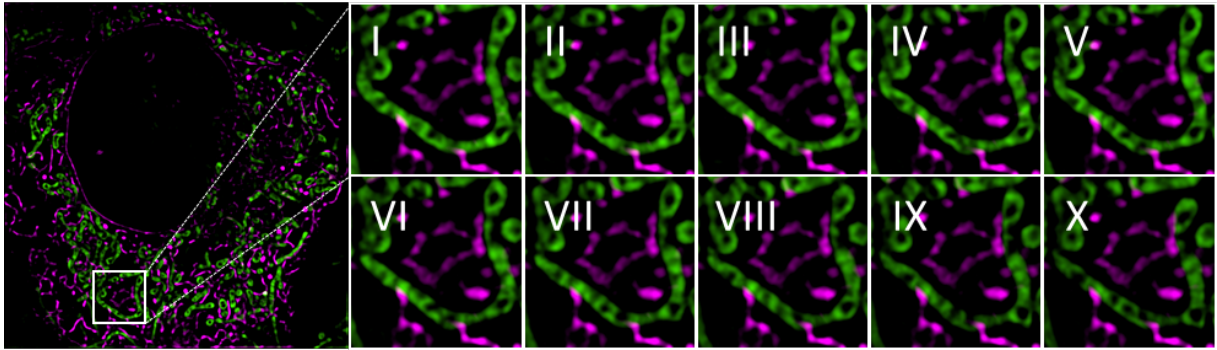

**Supplementary Figure 2.** HeLa cells transfected with ER-RFP (magenta) and stained 40 min with MTG (green) were imaged. A representative sequence of 10 frames (1 Hz) is shown as a magnification.

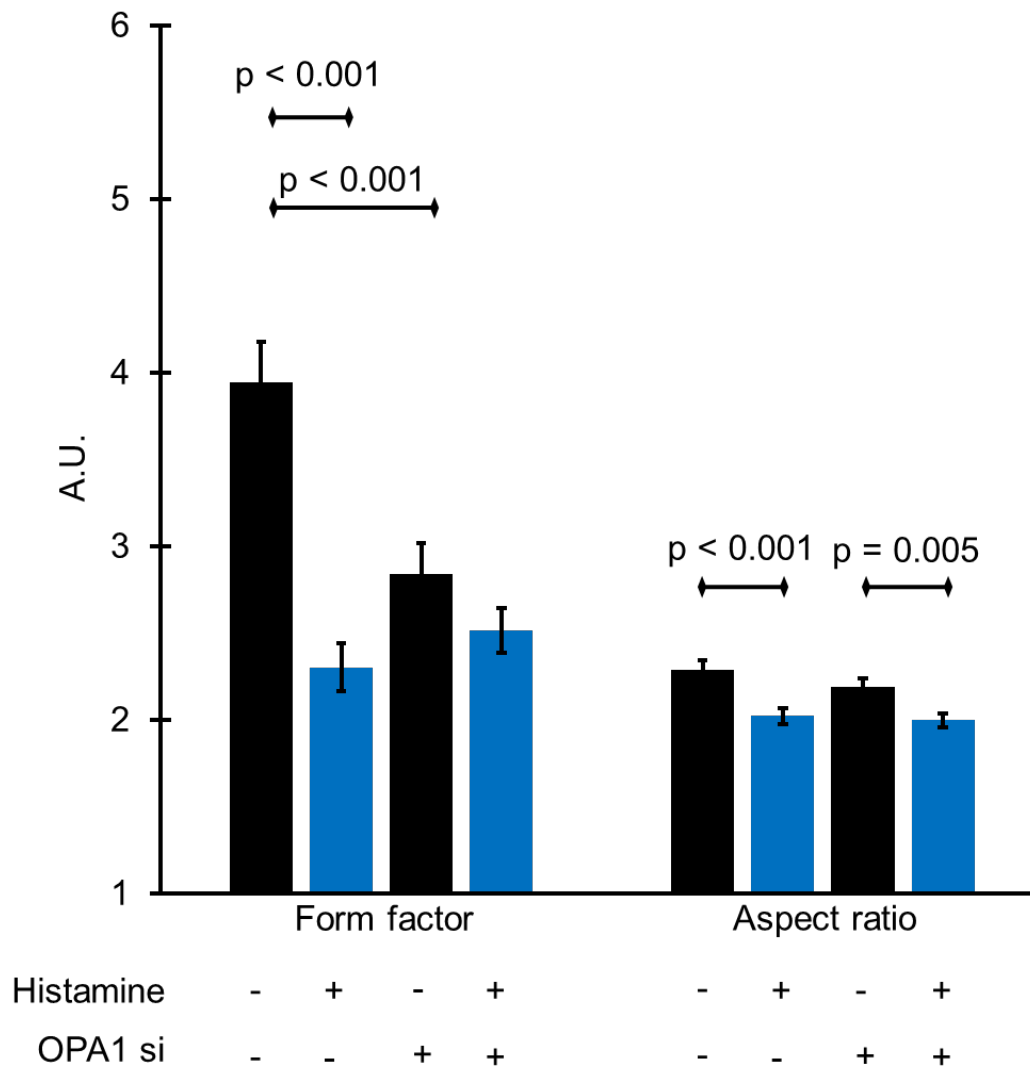

**Supplementary Figure 3.** HeLa cells stained with MTG and transfected with ER-RFP and control or OPA1-specific siRNAs were imaged with N-SIM. Histamine (100  $\mu$ M) was added to induce ER  $\text{Ca}^{2+}$  release. Form factor and aspect ratio were determined using ImageJ. Images and analyses were obtained from at least 5 cells in each of 8 experiments. Bars represent mean  $\pm$  SEM.

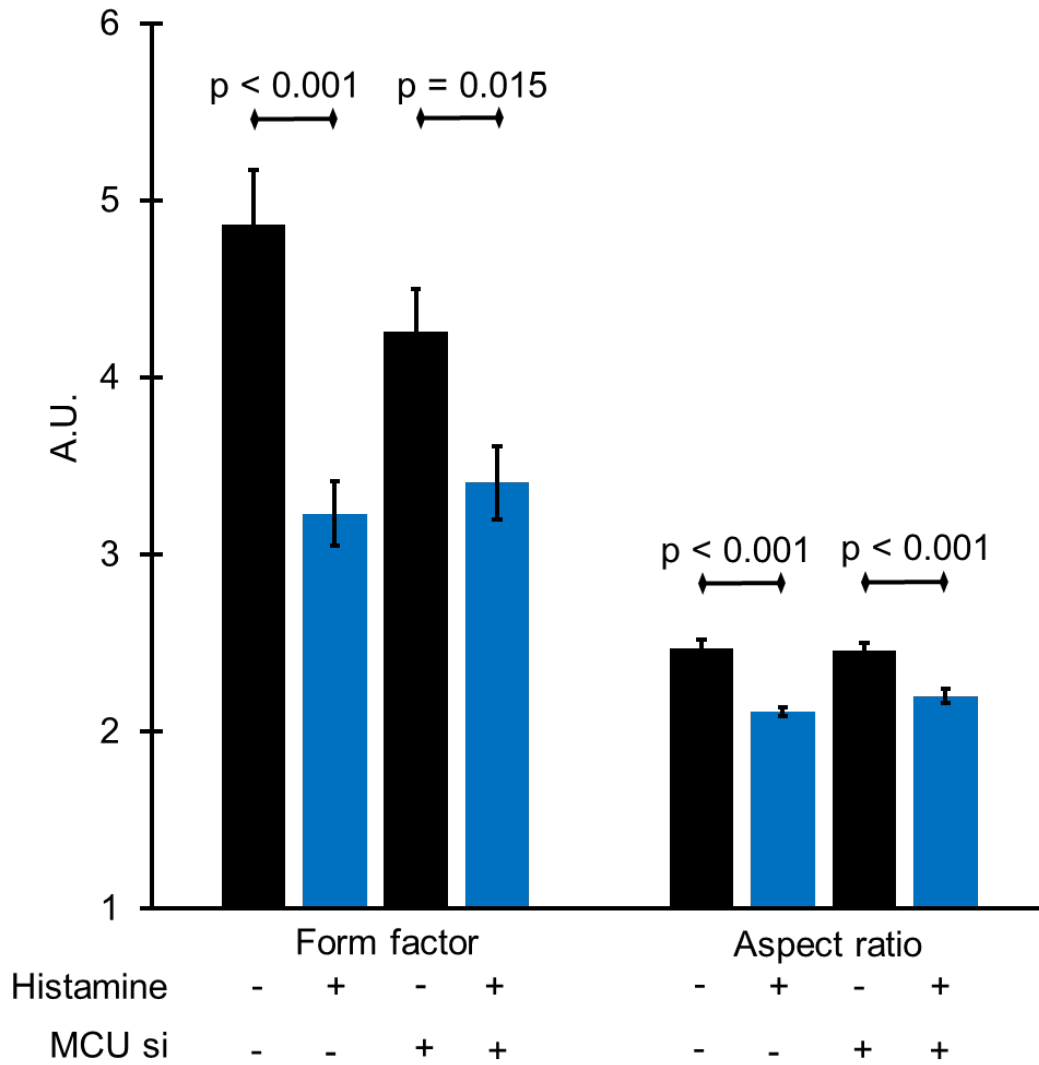

**Supplementary Figure 4.** HeLa cells stained with MTG and transfected with ER-RFP and control or MCU-specific siRNA were imaged with N-SIM. Histamine (100  $\mu\text{M}$ ) was added to induce ER  $\text{Ca}^{2+}$  release. Form factor and aspect ratio were determined using ImageJ. Images and analyses were obtained from at least 5 cells in each of 8 experiments. Bars represent mean  $\pm$  SEM.

**Supplementary Table 1:** Sequences of the specific siRNAs used in this study

| <b>Name</b> | <b>Sequence</b>                      |
|-------------|--------------------------------------|
| OPA1 si     | 5'-GUUAUCAGUCUGAGCCAGGdTdT-3'        |
| MCU si1     | 5'-GCC AGA GAC AGA CAA UAC U dTdT-3' |
| MCU si2     | 5'-GGA AAG GGA GCU UAU UGA A dTdT-3' |
